# Supplementary material for: Gender Differences in Factors Associated with the Total Delay in Treatment of Pulmonary Tuberculosis Patients: A Cross-Sectional Study in Selangor, Malaysia
Source: MDPI journal article supplement (doi:10.3390/ijerph19106258), 2022-05-21
Supplement: s1 [file s1]

**Supplementary Table S1. List of government health clinics and hospitals included in the study**

| District                         | Hulu Selangor                                                                                                                                                            | Kuala Selangor                                                                                                                                                                                        | Gombak                                                                                                                                                                                                                                                               | Hulu Langat                                                                                                                                                                                                                                                | Klang                                                                                                                                                                                                                                                                               | Petaling                                                                                                                                                                                                                                                                 | Selangor                                                                                                           | Sabak Bernam                                                                                                                                                                                                                      | Kuala Langat                                                                                                                                                                                                                                                                                                                |
|----------------------------------|--------------------------------------------------------------------------------------------------------------------------------------------------------------------------|-------------------------------------------------------------------------------------------------------------------------------------------------------------------------------------------------------|----------------------------------------------------------------------------------------------------------------------------------------------------------------------------------------------------------------------------------------------------------------------|------------------------------------------------------------------------------------------------------------------------------------------------------------------------------------------------------------------------------------------------------------|-------------------------------------------------------------------------------------------------------------------------------------------------------------------------------------------------------------------------------------------------------------------------------------|--------------------------------------------------------------------------------------------------------------------------------------------------------------------------------------------------------------------------------------------------------------------------|--------------------------------------------------------------------------------------------------------------------|-----------------------------------------------------------------------------------------------------------------------------------------------------------------------------------------------------------------------------------|-----------------------------------------------------------------------------------------------------------------------------------------------------------------------------------------------------------------------------------------------------------------------------------------------------------------------------|
| No. of government health clinics | 6                                                                                                                                                                        | 7                                                                                                                                                                                                     | 10                                                                                                                                                                                                                                                                   | 11                                                                                                                                                                                                                                                         | 11                                                                                                                                                                                                                                                                                  | 9                                                                                                                                                                                                                                                                        | 4                                                                                                                  | 7                                                                                                                                                                                                                                 | 10                                                                                                                                                                                                                                                                                                                          |
| Government health clinics        | <ul style="list-style-type: none"> <li>• Hulu Yam Bharu</li> <li>• Rasa</li> <li>• Serendah</li> <li>• Sg Selisek</li> <li>• Kalumpang</li> <li>• Kg Soeharto</li> </ul> | <ul style="list-style-type: none"> <li>• Bestari Jaya</li> <li>• Bukit Cherakah</li> <li>• Jeram</li> <li>• Kuala Selangor</li> <li>• Sg Tenggi Kanan</li> <li>• Ijok</li> <li>• Tg Karang</li> </ul> | <ul style="list-style-type: none"> <li>• AU2 Keramat</li> <li>• Batu Arang</li> <li>• Kuang</li> <li>• Rawang</li> <li>• Selayang Baru</li> <li>• Taman Ehsan</li> <li>• Ulu Klang</li> <li>• Bt 8 Gombak</li> <li>• Gombak Setia</li> <li>• Sungai Buloh</li> </ul> | <ul style="list-style-type: none"> <li>• Balakong</li> <li>• Bandar Seri Putra</li> <li>• BB Bangi</li> <li>• Beranang</li> <li>• Bt 14 Cheras</li> <li>• Kajang</li> <li>• Sg Chua</li> <li>• Ampang</li> <li>• Semenyih</li> <li>• Sg Sekamat</li> </ul> | <ul style="list-style-type: none"> <li>• Anika, Klang</li> <li>• Botanik</li> <li>• Bukit Kuda</li> <li>• Bukit Naga</li> <li>• Kapar</li> <li>• Pel Klang</li> <li>• Pulau Indah</li> <li>• Rantau Panjang</li> <li>• Meru</li> <li>• Pandamaran</li> <li>• Pulau Ketam</li> </ul> | <ul style="list-style-type: none"> <li>• Bt 13 Puchong</li> <li>• Kelana Jaya</li> <li>• Lembah Subang</li> <li>• Paya Jaras</li> <li>• Sek 7 Shah Alam</li> <li>• Seri Kembangan</li> <li>• Bt 14 Puchong</li> <li>• Sek 19 Shah Alam</li> <li>• Taman Medan</li> </ul> | <ul style="list-style-type: none"> <li>• Dengkil</li> <li>• Salak</li> <li>• Sepang</li> <li>• Sg Pelek</li> </ul> | <ul style="list-style-type: none"> <li>• Bagan Terap</li> <li>• Merbau Berdarah</li> <li>• Sabak Bernam</li> <li>• Sekinchan</li> <li>• Sg Air Tawar</li> <li>• Parit Baru</li> <li>• Sg Besar</li> <li>• Simpang Lima</li> </ul> | <ul style="list-style-type: none"> <li>• Jenjarom</li> <li>• Kanchong Darat</li> <li>• Kg Bandar</li> <li>• Sg Lang Tengah</li> <li>• Sijangkang</li> <li>• Telok Panglima Garang</li> <li>• Tg Sepat</li> <li>• Bt 10, Kebun Baru</li> <li>• Bukit Changgang</li> <li>• Telok Datok</li> <li>• Hospital Banting</li> </ul> |
| Government hospitals             |                                                                                                                                                                          | <ul style="list-style-type: none"> <li>• Hospital Tanjung Karang</li> </ul>                                                                                                                           | <ul style="list-style-type: none"> <li>• Hospital Sungai Buloh</li> </ul>                                                                                                                                                                                            |                                                                                                                                                                                                                                                            | <ul style="list-style-type: none"> <li>• Hospital Tengku Ampuan Rahimah</li> </ul>                                                                                                                                                                                                  |                                                                                                                                                                                                                                                                          |                                                                                                                    | <ul style="list-style-type: none"> <li>• Hospital Tengku Ampuan Jemaah</li> </ul>                                                                                                                                                 |                                                                                                                                                                                                                                                                                                                             |
| Sample size                      | 28                                                                                                                                                                       | 25                                                                                                                                                                                                    | 115                                                                                                                                                                                                                                                                  | 187                                                                                                                                                                                                                                                        | 123                                                                                                                                                                                                                                                                                 | 285                                                                                                                                                                                                                                                                      | 18                                                                                                                 | 12                                                                                                                                                                                                                                | 30                                                                                                                                                                                                                                                                                                                          |
